# Supplementary material for: MOF-derived cobalt–nickel phosphide nanoboxes as electrocatalysts for the hydrogen evolution reaction
Source: Royal Society of Chemistry journal article supplement (doi:10.1039/c9nr07002h), 2019-01-01
Supplement: c9nr07002h1.pdf [file c9nr07002h1.pdf]

## MOF-derived cobalt-nickel phosphide nanoboxes as electrocatalyst for the hydrogen evolution reaction

Yidong Lu,<sup>a</sup> YaoYao Deng,<sup>b</sup> Shuanglong Lu,<sup>c</sup> YaYuan Liu,<sup>a</sup> Jianping Lang,<sup>d</sup> Xueqin Cao,<sup>\*a</sup> and Hongwei Gu<sup>\*a</sup>

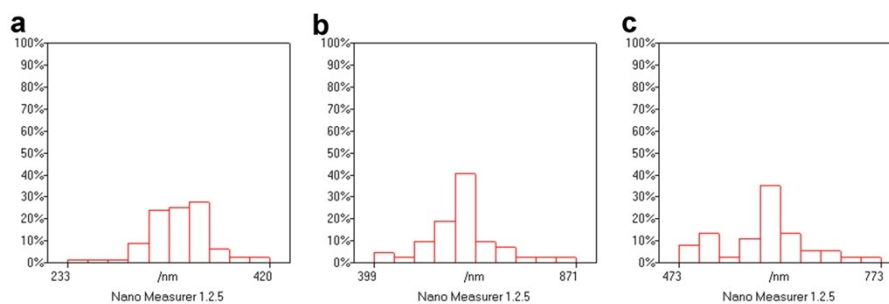

**Figure S1.** Particle size statistics for Co-MOF (a), CoNi-MOF (b) and CoNiP-4 (c).

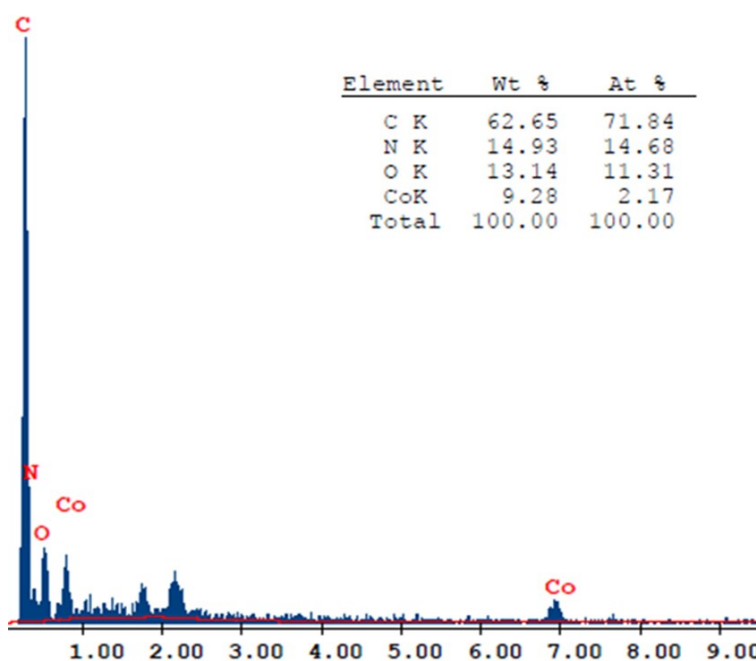

**Figure S2.** EDS spectrum of Co-MOF.

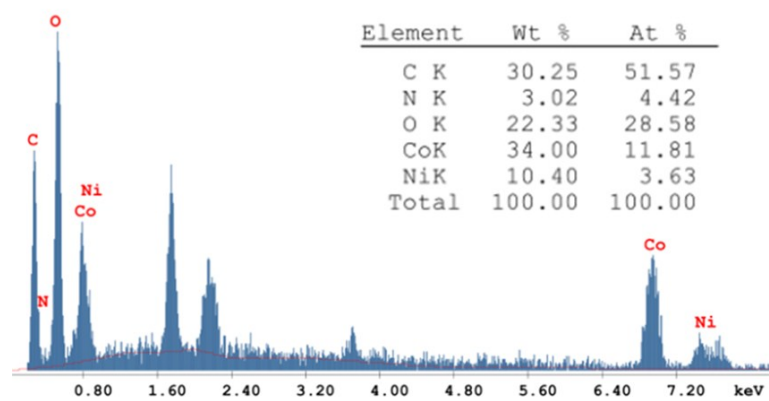

Figure S3. EDS spectrum of CoNi-MOF.

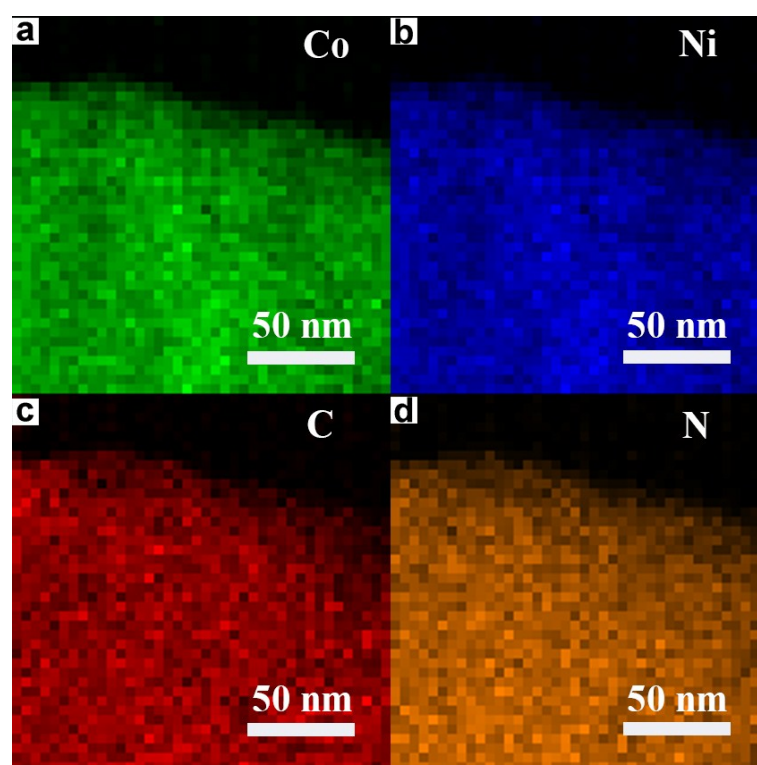

Figure S4. Element mapping images of CoNi-MOF of Co, Ni, C and N(a, b, c and d).

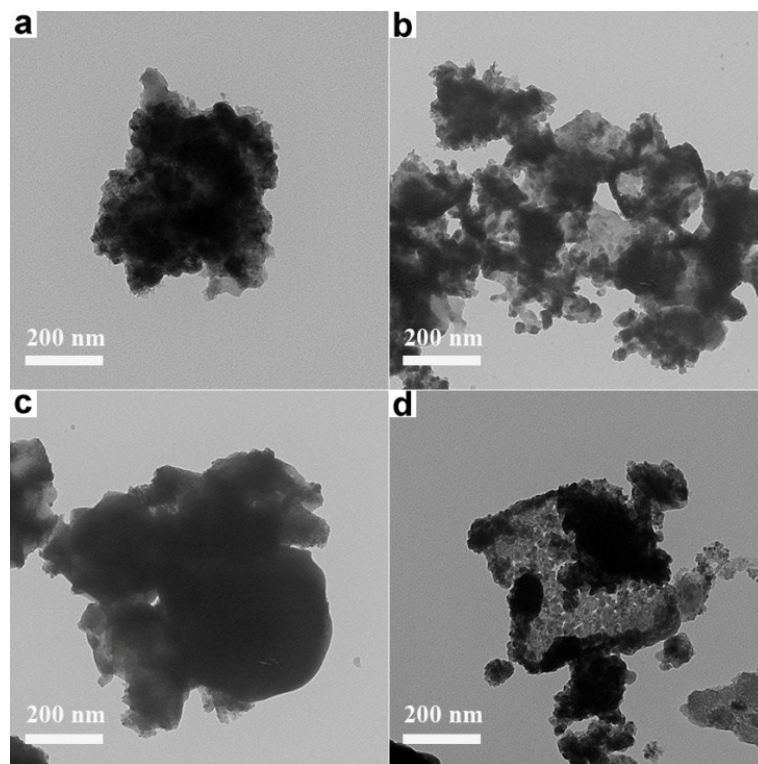

Figure S5. TEM of CoNiP-1 (a), CoNiP-2 (b), CoNiP-3 (c) and CoNiP-5 (d).

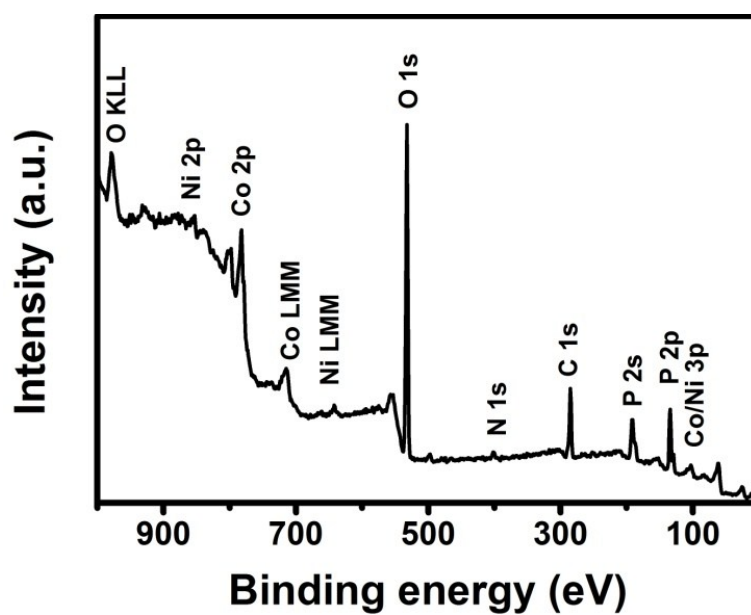

Figure S6. XPS survey spectrum of CoNiP-4.

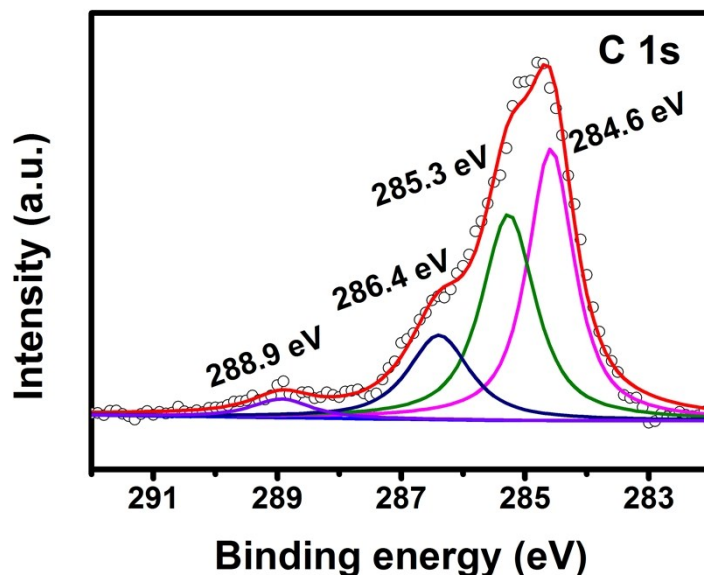

Figure S7. XPS spectra for C 1s.

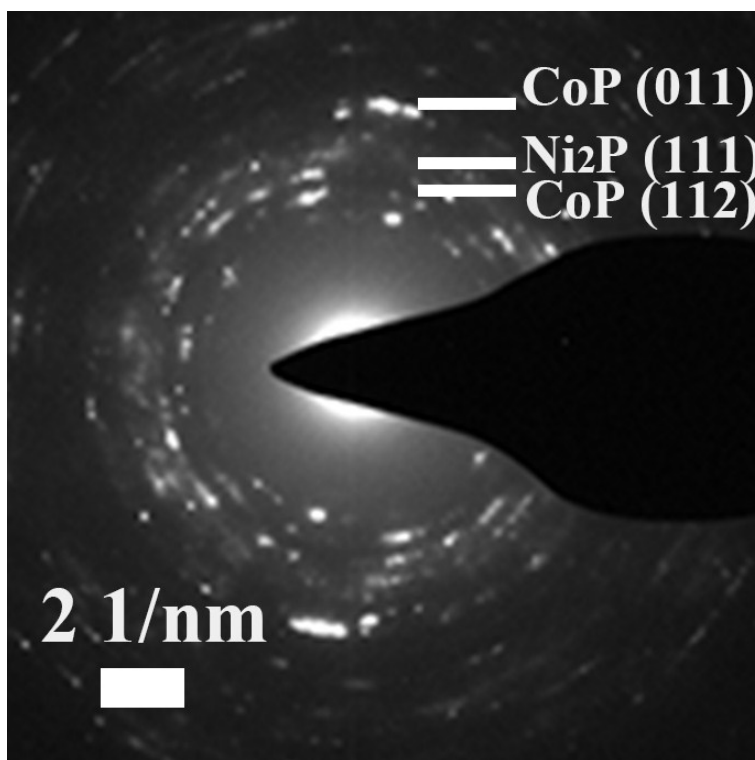

Figure S8. SAED pattern of CoNiP-4.

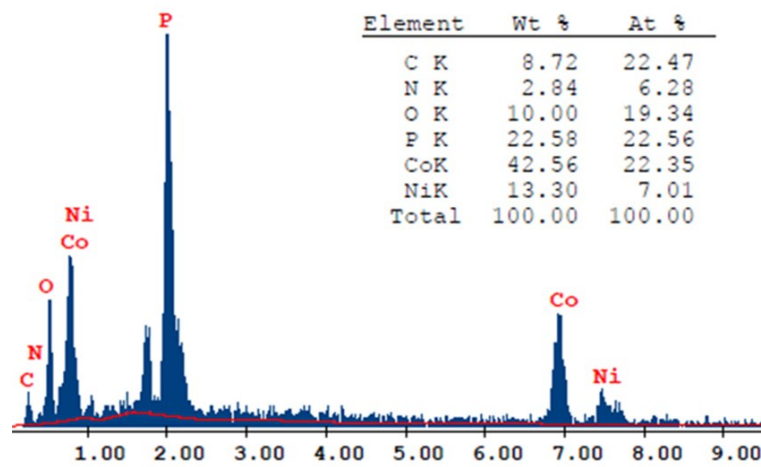

Figure S9. EDS spectrum of CoNiP-4.

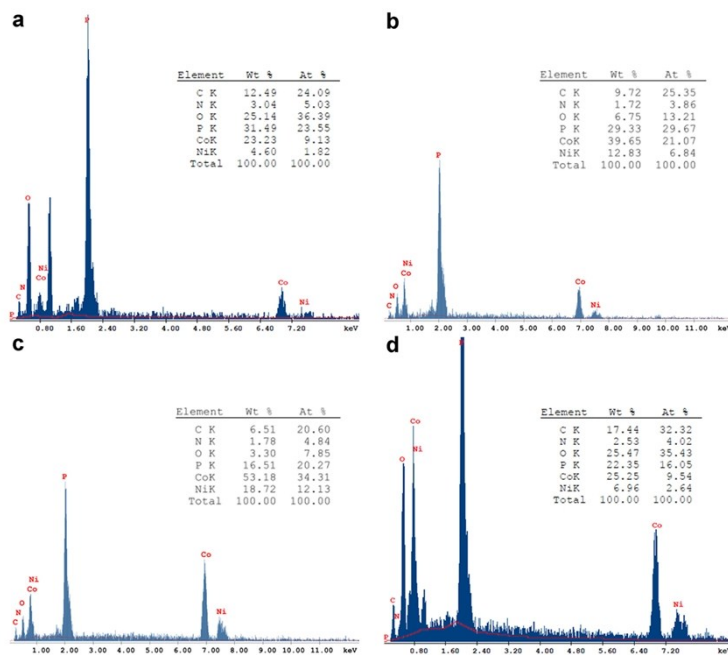

Figure S10. EDS spectrum of CoNiP-1 (a), CoNiP-2 (b), CoNiP-3 (c) and CoNiP-5 (d).

**Table S1.** ICP-MS of CoNi-MOF and CoNiP-4.

| Sample   | Co (Wt %) | Ni (Wt %) |
|----------|-----------|-----------|
| CoNi-MOF | 16.73     | 4.34      |
| CoNiP-4  | 24.61     | 6.98      |

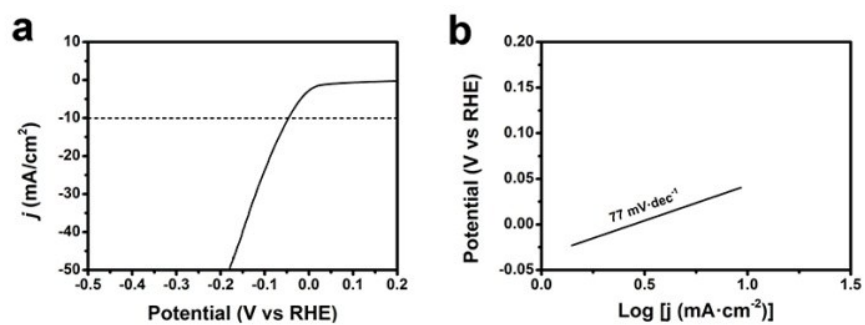

**Figure S11.** (a) Linear sweep voltammetry HER curves, (b) Tafel plots of Pt/C (20%).

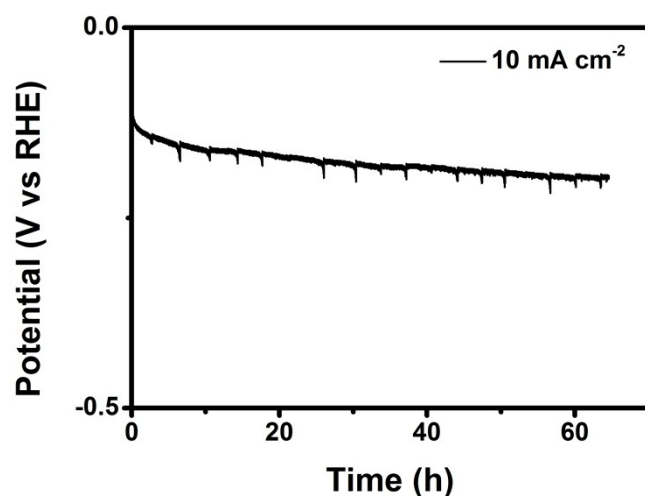

**Figure S12.** Chronopotentiometric curve of CoNiP-4 at 10 mA cm<sup>-2</sup> in 1 M KOH.

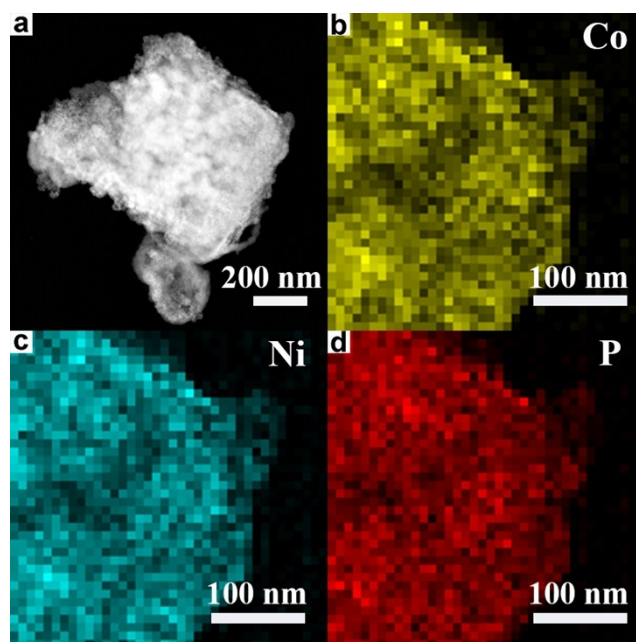

**Figure S13.** (a) HAADF-STEM image of CoNiP-4 after Chronopotentiometry test and its corresponding element mapping images of Co, Ni, and P (b, c and d).

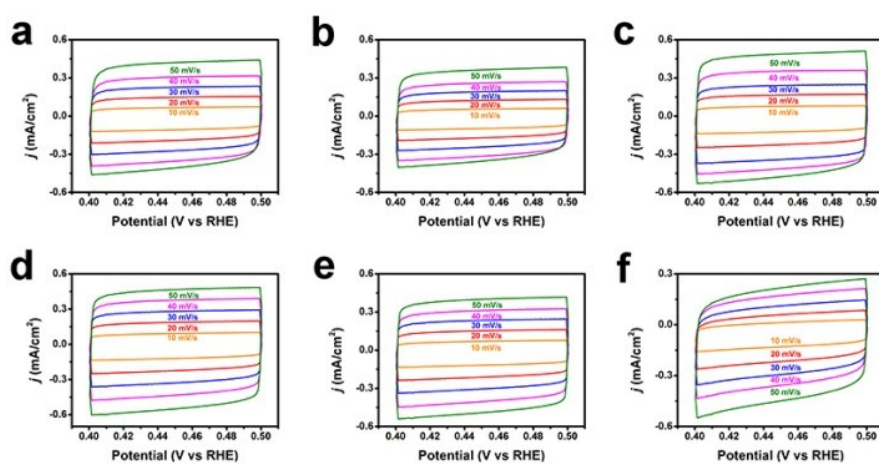

**Figure S14.** CV curves of CoNiP-1 (a), CoNiP-2 (b), CoNiP-3 (c), CoNiP-4 (d), CoNiP-5 (e) and CoNi-MOF (f) with different scan rates from 10 to 50  $\text{mV s}^{-1}$ .

**Table S2.** Comparison of HER performance for various Co/Ni-based phosphides electrocatalysts.

| Catalyst                         | $\eta_{10}$ (mV) | Tafel slope (mV/dec) | Ref.                                              |
|----------------------------------|------------------|----------------------|---------------------------------------------------|
| Amorphous CoP                    | 143              | 63                   | <i>J. Mater. Chem. A</i> , 2019, <b>7</b> , 15749 |
| CoP/NC                           | 154              | 51                   | <i>Chem. Mater.</i> , 2015, <b>27</b> , 7636      |
| CoP@NPCP                         | 150              | 20                   | <i>Carbon</i> , 2019, <b>150</b> , 446            |
| Ni <sub>90</sub> P <sub>10</sub> | 234              | 75.4                 | <i>Chem. Commun.</i> , 2018, <b>54</b> , 12408    |
| Ni <sub>2</sub> P@mesoG          | 188              | 99                   | <i>Mater. Chem. Front.</i> , 2017, <b>1</b> , 973 |
| NiCoP                            | 150              | 60                   | <i>Chem. Commun.</i> , 2016, <b>52</b> , 1633     |
| CoNiP-4                          | 138              | 65                   | This work                                         |
